# Supplementary material for: Integrative Transcriptomic and Phytohormonal Analyses Provide Insights into the Cold Injury Recovery Mechanisms of Tea Leaves
Source: MDPI journal article supplement (doi:10.3390/plants11202751), 2022-10-18
Supplement: s1 [file s1]

**Table S5.** The primer sequences for qPCR.

| Gene            | primer (5'→3') |                          |
|-----------------|----------------|--------------------------|
| <i>β</i> -actin | F              | CTTCCTCATGCTATCCTCCGTCTT |
|                 | R              | ATTTCCTCGTTCAGCAGTGGTG   |
| PAL             | F              | ACGACAACCCCTTGATCGAC     |
|                 | R              | TTGATGCCAAAGCCAGCCTA     |
| 4CL             | F              | TTCATGCGGAACTGTGGTCA     |
|                 | R              | TGGAGCCAACCATCCACATC     |
| CHS             | F              | GCAGGACATGGTTGTGGTTG     |
|                 | R              | TTGACTGATGGGCGAAGACC     |
| LAR             | F              | GCCTACGTACCTTCTCGTCC     |
|                 | R              | CAACGTCATGCCCAAACCTCC    |
| F3'H            | F              | CACCCATCAACCCCACTCTC     |
|                 | R              | GCCACCAGGTAGGAATCGTT     |
| DFR             | F              | TGCCAGTTGTGTCGTTCTC      |
|                 | R              | AGCAAACCCTTCTCTCTGC      |
| C4H             | F              | TCAAGGACACGAGGTTGCAG     |
|                 | R              | TGGGTGGTTGACGAGTTCTG     |
| ANS             | F              | AACAAGCGAGTACGCAAAGC     |
|                 | R              | TGAAGCTCTTCCATGCCTCC     |
| FLS             | F              | CCCTCGGAGTTGAACCTCAC     |
|                 | R              | ACGACAAACACAGCCCAAGA     |
