# Supplementary material for: Integrative Transcriptomic and Phytohormonal Analyses Provide Insights into the Cold Injury Recovery Mechanisms of Tea Leaves
Source: MDPI journal article supplement (doi:10.3390/plants11202751), 2022-10-18
Supplement: s1 [file s1]

**Table S1.** Statistics on the RNA-Seq data.

| Sample   | Raw data (bp) | Clean data (bp) | Clean reads | Genes matched to<br>reference genome (%) |
|----------|---------------|-----------------|-------------|------------------------------------------|
| Row 2_1  | 6724865100    | 6676321645      | 44761522    | 29321 (86.41%)                           |
| Row 2_2  | 6206443800    | 6169568604      | 41308512    | 24690 (72.76%)                           |
| Row 2_3  | 6916097400    | 6880030586      | 46034736    | 24361 (71.79%)                           |
| Row 5_1  | 7842801300    | 7795403591      | 52203746    | 24496 (72.19%)                           |
| Row 5_2  | 6475807200    | 6438598476      | 43104232    | 25164 (74.16%)                           |
| Row 5_3  | 5720299500    | 5684113075      | 38065882    | 24938 (73.49%)                           |
| Row 8_1  | 7418668200    | 7359537936      | 49364428    | 24664 (72.69%)                           |
| Row 8_2  | 6053926800    | 6008380348      | 40275690    | 25173 (74.19%)                           |
| Row 8_3  | 7301307900    | 7255449941      | 48588656    | 24935 (73.49%)                           |
| Row 11_1 | 7599596400    | 7555110233      | 50583830    | 25063 (73.86%)                           |
| Row 11_2 | 7371006600    | 7325790371      | 49063844    | 25091 (73.94%)                           |
| Row 11_3 | 5920353900    | 5881491265      | 39409710    | 25074 (73.89%)                           |
