# Supplementary figures and images for: Integrative Transcriptomic and Phytohormonal Analyses Provide Insights into the Cold Injury Recovery Mechanisms of Tea Leaves
Source: MDPI journal article supplement (doi:10.3390/plants11202751), 2022-10-18

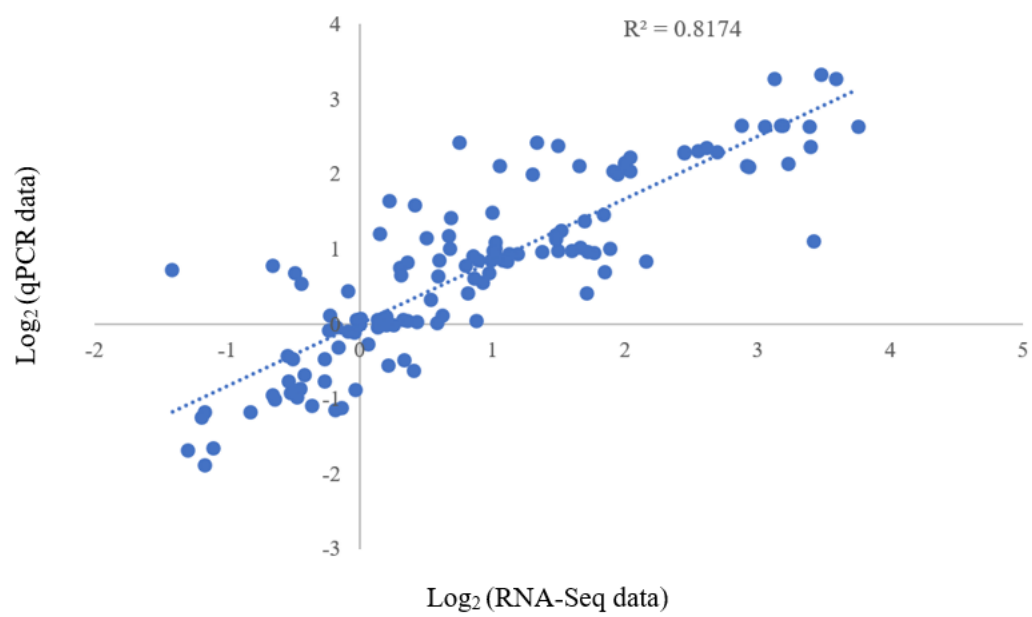

**Figure S1.** The correlation between RNA-Seq result and qPCR data

Supplement: s1 [file s1]
